# Supplementary material for: Understanding Pathogen-host Interplay by Expression Profiles of LncRNA and mRNA in the Liver of Echinococcus Multilocularis-infected Mice
Source: Research Square preprint supplement (doi:10.21203/rs.3.rs-589602/v1), 2021-06-10
Supplement: Supplementary file 1 [file 62eb3e3e79aa4188202f281e.xlsx]

## Sheet: Sheet1
Supplementary TABLE S1 | The primers of mRNAs and lncRNAs in our verification result
Gene	Forward primer (5'-3')	Reverse primer (5'-3')
Gng4	5’-CTTTGCTGTGGCTTGTGCTC -3’	5’-GCAGAAGTTGGCTGTTGGAAG -3’
Lcn2	5’-CCACCACGGACTACAACCA -3’	5’-TGGCAAAGCGGGTGAAAC -3’
Ruvbl2	5’-GGAGGAAGATGTGGAGATGAGTG -3’	5’-TGTCCATTGTTTCGCCTTTG -3’
Bnip1	5’-CAAGGGAGCAAGACAAGGAG -3’	5’-TGGTTTTCCTTTGCCGTAAG -3’
Abr	5’-AAGTGGAGAGCAAAGCACATCTC -3’	5’-GGGAGTTTCTGTTGCAGTCTTTC -3’
G6pc	5’-GGCAAGGAGACCCAGGATTC -3’	5’-TGAAGAAGTACTCTGCAAATCAGC -3’
Cyp4a10	5’-CCTGGGATCACCTAGACCAGATT -3’	5’-CTTCGGGTTGTGGTGGAGA -3’
Prdx4	5’-TGGATTTCACCTTTGTGTGTCC -3’	5’-GGGTAAACTGAGAGTCAACAGAGCA -3’
Rpl23a	5’-CAGCCATGAAGAAAATAGAGGACAA -3’	5’-TCAGGAGCCAAGCGAACATAC -3’
Trp53	5’-GCTTTGAGGTTCGTGTTTGTG -3’	5’-GCGGATCTTGAGGGTGAAA -3’
NONMMUT120083.1	5’-TAGAGCTTGCAGCCACTCCT-3’	5’-TTCCAAATGGTCCCTGTTGT-3’
AK017047	5’-GAACGTACCTTGGCACCTGT-3’	5’-CATGCTGCTCTCTCCCTTTC-3’
NONMMUT137613.1	5’-ACGGAGTTTGGAAGAGGGTGT -3’	5’-GATTGAGTATCCAGCATTCACTTTG -3’
NONMMUT081543.1	5’-TCCACGTCACCCATCATTACA -3’	5’-CAATCTTTAGCCTGCCCAATC -3’
AK014756	5’-GCCGTTCCAGAGCACAGAT -3’	5’-CCACAGTTCATGCCCCAAA -3’
NONMMUT062621.2	5’-TGCAGAGTAATGCTGAACTTTAGGG -3’	5’-AACCTCCTCTTCTGGCTTTGG -3’
AK079007	5’-CCGAGATCACCTGGGAAAA -3’	5’-CCTAGTCCAGAATGCCAAAGGT -3’
NONMMUT102390.1	5’-CAGTCACCAGGACATCACCTTTAC -3’	5’-CTCATCCCCACCTGATTTTCTC -3’
AK044084	5’-GCAATCAGAGATACAGGAAATCG -3’	5’-AGAGGGAAGCAAGGTGAGAGG -3’
ENSMUST00000140645.1	5’-CTGCCAAGCTGGAGAAACTG -3’	5’-GTGTGTTATGTATGTGTTGGGGTGT -3’
